# Supplementary material
Source: PubMed Central journal article supplement (PMC10549728)
Supplement: boe-14-8-4017-s001.pdf [file boe-14-8-4017-s001.pdf]

## Diffuse reflectance spectroscopy for accurate margin assessment in breast-conserving surgeries: importance of an optimal number of fibers: supplement

**DINUSHA VELUPONNAR,<sup>1,2,\*</sup> BEHDAD DASHTBOZORG,<sup>1</sup> LYNN-JADE S. JONG,<sup>1,2</sup> FREIJA GELDOF,<sup>1,2</sup> MARCOS DA SILVA GUIMARAES,<sup>3</sup> MARIE-JEANNE T. F. D. VRANCKEN PEETERS,<sup>1</sup> FREDERIEKE VAN DUIJNHOFEN,<sup>1</sup> HENRICUS J. C. M. STERENBORG,<sup>1,4</sup> THEO J. M. RUERS,<sup>1,2</sup> AND LISANNE L. DE BOER<sup>1</sup>**

<sup>1</sup>*Department of Surgery, Netherlands Cancer Institute, Plesmanlaan 121, 1066 CX Amsterdam, The Netherlands*

<sup>2</sup>*Department of Nanobiophysics, Faculty of Science and Technology, University of Twente, Drienerlolaan 5, 7522 NB Enschede, The Netherlands*

<sup>3</sup>*Department of Pathology, Netherlands Cancer Institute, Plesmanlaan 121, 1066 CX Amsterdam, The Netherlands*

<sup>4</sup>*Department of Biomedical Engineering and Physics, Amsterdam University Medical Center, Meibergdreef 9, 1105 AZ Amsterdam, Netherlands*

\*[d.veluponnar@nki.nl](mailto:d.veluponnar@nki.nl)

---

This supplement published with Optica Publishing Group on 10 July 2023 by The Authors under the terms of the [Creative Commons Attribution 4.0 License](https://creativecommons.org/licenses/by/4.0/) in the format provided by the authors and unedited. Further distribution of this work must maintain attribution to the author(s) and the published article's title, journal citation, and DOI.

Supplement DOI: <https://doi.org/10.6084/m9.figshare.23283146>

Parent Article DOI: <https://doi.org/10.1364/BOE.493179>

# Diffuse Reflectance Spectroscopy for Accurate Margin Assessment in Breast-Conserving Surgeries: Importance of Optimal Number of Fibers: supplemental document

This document provides supplementary information to "Diffuse Reflectance Spectroscopy for Accurate Margin Assessment in Breast-Conserving Surgeries: Importance of Optimal Number of Fibers".

## 1. EFFECT OF TUMOR PERCENTAGE ON CLASSIFICATION PERFORMANCE

**Table S1.** Sensitivity and specificity of all classification models.

| Number of fibers | TTP 10%          |                  | TTP 20%          |                  | TTP 30%          |                  | TTP 40%          |                  |
|------------------|------------------|------------------|------------------|------------------|------------------|------------------|------------------|------------------|
|                  | Sensitivity (SD) | Specificity (SD) |
| 1                | 85% (0.079)      | 54% (0.630)      | 80% (0.0011)     | 50% (0.340)      | 87% (0.100)      | 51% (0.700)      | 88% (0.140)      | 64% (1.27)       |
| 2                | 86% (0.130)      | 71% (0.310)      | 81% (0.0011)     | 51% (0.740)      | 83% (0.140)      | 61% (0.850)      | 89% (0.140)      | 57% (1.27)       |
| 3                | 88% (0.228)      | 85% (0.430)      | 90% (0.0001)     | 73% (0.800)      | 91% (0.001)      | 69% (0.880)      | 91% (0.001)      | 78% (1.04)       |
| 4                | 88% (0.456)      | 86% (0.710)      | 92% (0.0012)     | 80% (0.800)      | 91% (0.001)      | 75% (1.07)       | 92% (0.001)      | 78% (1.27)       |
| 5                | 93% (0.790)      | 67% (0.430)      | 93% (0.0001)     | 75% (0.800)      | 93% (0.001)      | 71% (1.07)       | 92% (0.001)      | 76% (1.27)       |

TTP: Tumor Threshold Percentage
